# Supplementary material for: Nonconditioned ADA-SCID gene therapy reveals ADA requirement in the hematopoietic system and clonal dominance of vector-marked clones
Source: PubMed Central journal article supplement (PMC8566957; doi:10.1016/j.omtm.2021.10.003), 2021-10-16
Supplement: mmc1.pdf [file mmc1.pdf]

**Supplemental information**

**Nonconditioned ADA-SCID gene therapy reveals ADA requirement in the hematopoietic system and clonal dominance of vector-marked clones**

**Toru Uchiyama, Sirirat Takahashi, Kazuhiko Nakabayashi, Kohji Okamura, Kaori Edasawa, Masafumi Yamada, Nobuyuki Watanabe, Emi Mochizuki, Toru Yasuda, Akane Miura, Motohiro Kato, Daisuke Tomizawa, Makoto Otsu, Tadashi Ariga, and Masafumi Onodera**









|    |           |           |              |   |   |   |                |                                               |             |             |
|----|-----------|-----------|--------------|---|---|---|----------------|-----------------------------------------------|-------------|-------------|
| 5  | 69938092  | 69938284  | 5_69938138   | 0 | 1 | 1 | intergenic     | SMA5(dist=56590),SERF1A(dist=258332)          | 5.89275E-05 | 0.005892752 |
| 5  | 70117564  | 70117756  | 5_70117610   | 0 | 1 | 1 | intergenic     | SMA5(dist=236062),SERF1A(dist=78860)          | 5.89275E-05 | 0.005892752 |
| 5  | 72248598  | 72248790  | 5_72248746   | 1 | 0 | 1 | intergenic     | TNPO1(dist=38532),FCHO2(dist=3042)            | 5.89275E-05 | 0.005892752 |
| 5  | 99026574  | 99026766  | 5_99026722   | 1 | 0 | 1 | intergenic     | 100289230(dist=760010),LOC100133050(dist=688) | 5.89275E-05 | 0.005892752 |
| 5  | 118742871 | 118743063 | 5_118742917  | 0 | 1 | 1 | intergenic     | TNFaip8(dist=12624),HSD17B4(dist=45201)       | 5.89275E-05 | 0.005892752 |
| 6  | 32937137  | 32937329  | 6_32937285   | 1 | 0 | 1 | intronic       | BRD2                                          | 5.89275E-05 | 0.005892752 |
| 6  | 47890139  | 47890328  | 6_47890284   | 1 | 0 | 1 | intronic       | PTCHD4                                        | 5.89275E-05 | 0.005892752 |
| 6  | 81948198  | 81948388  | 6_81948244   | 0 | 1 | 1 | intergenic     | BCKDHB(dist=892258),FAM46A(dist=507183)       | 5.89275E-05 | 0.005892752 |
| 6  | 102249984 | 102250176 | 6_102250132  | 1 | 0 | 1 | intronic       | GRIK2                                         | 5.89275E-05 | 0.005892752 |
| 6  | 113537263 | 113537455 | 6_113537411  | 1 | 0 | 1 | intergenic     | RFPL4B(dist=864914),MARCKS(dist=641096)       | 5.89275E-05 | 0.005892752 |
| 6  | 151541947 | 151542139 | 6_151542095  | 1 | 0 | 1 | intergenic     | MTHFD1L(dist=119073),AKAP12(dist=19019)       | 5.89275E-05 | 0.005892752 |
| 7  | 2545985   | 2546177   | 7_2546133    | 1 | 0 | 1 | intergenic     | CHST12(dist=71918),LFNG(dist=6010)            | 5.89275E-05 | 0.005892752 |
| 7  | 36507941  | 36508133  | 7_36508089   | 1 | 0 | 1 | intergenic     | ANLN(dist=14690),AOAH(dist=44440)             | 5.89275E-05 | 0.005892752 |
| 7  | 101122703 | 101122892 | 7_101122749  | 0 | 1 | 1 | intronic       | COL26A1                                       | 5.89275E-05 | 0.005892752 |
| 8  | 121781    | 121973    | 8_121827     | 0 | 1 | 1 | intergenic     | OR4F21(dist=4804),RPL23AP53(dist=36498)       | 5.89275E-05 | 0.005892752 |
| 8  | 92563902  | 92564094  | 8_92563948   | 0 | 1 | 1 | intergenic     | SLC26A7(dist=153571),RUNX1T1(dist=403227)     | 5.89275E-05 | 0.005892752 |
| 9  | 27695643  | 27695835  | 9_27695689   | 0 | 1 | 1 | intergenic     | C9orf72(dist=121826),LINGO2(dist=252375)      | 5.89275E-05 | 0.005892752 |
| 9  | 42413976  | 42414168  | 9_42414124   | 1 | 0 | 1 | intergenic     | ANKRD20A3(dist=2262),FAM95B1(dist=54445)      | 5.89275E-05 | 0.005892752 |
| 10 | 10736746  | 10736938  | 10_10736792  | 0 | 1 | 1 | intergenic     | NONE(dist=NONE),SFTA1P(dist=89590)            | 5.89275E-05 | 0.005892752 |
| 10 | 12136491  | 12136680  | 10_12136537  | 0 | 1 | 1 | intronic       | DHTKD1                                        | 5.89275E-05 | 0.005892752 |
| 10 | 13473850  | 13474042  | 10_13473896  | 0 | 1 | 1 | intergenic     | SEPHS1(dist=83599),BEND7(dist=6568)           | 5.89275E-05 | 0.005892752 |
| 10 | 104359065 | 104359257 | 10_104359111 | 0 | 1 | 1 | intronic       | SUFU                                          | 5.89275E-05 | 0.005892752 |
| 10 | 106330497 | 106330689 | 10_106330645 | 1 | 0 | 1 | intergenic     | CCDC147(dist=115798),SORCS3(dist=70194)       | 5.89275E-05 | 0.005892752 |
| 11 | 49748902  | 49749094  | 11_49749050  | 1 | 0 | 1 | ncRNA_intronic | LOC440040                                     | 5.89275E-05 | 0.005892752 |
| 11 | 129983153 | 129983345 | 11_129983199 | 0 | 1 | 1 | intronic       | APLP2                                         | 5.89275E-05 | 0.005892752 |
| 12 | 16905572  | 16905764  | 12_16905720  | 1 | 0 | 1 | intergenic     | LMO3(dist=144573),SKP1P2(dist=235941)         | 5.89275E-05 | 0.005892752 |
| 12 | 44502720  | 44502912  | 12_44502868  | 1 | 0 | 1 | intronic       | TMEM117                                       | 5.89275E-05 | 0.005892752 |
| 12 | 67134253  | 67134445  | 12_67134299  | 0 | 1 | 1 | intergenic     | GRIPI(dist=61375),CAND1(dist=528742)          | 5.89275E-05 | 0.005892752 |
| 12 | 120337763 | 120337913 | 12_120337869 | 1 | 0 | 1 | intergenic     | CIT(dist=22775),CCDC64(dist=89759)            | 5.89275E-05 | 0.005892752 |
| 13 | 19855775  | 19855911  | 13_19855867  | 1 | 0 | 1 | ncRNA_intronic | ANKRD26P3                                     | 5.89275E-05 | 0.005892752 |
| 14 | 41655205  | 41655397  | 14_41655353  | 1 | 0 | 1 | intergenic     | FBXO33(dist=1753650),LRFN5(dist=421391)       | 5.89275E-05 | 0.005892752 |
| 14 | 55553266  | 55553458  | 14_55553414  | 1 | 0 | 1 | intergenic     | MAPK1IP1L(dist=16503),LGALS3(dist=42501)      | 5.89275E-05 | 0.005892752 |
| 14 | 103306548 | 103306740 | 14_103306696 | 1 | 0 | 1 | intronic       | TRAF3                                         | 5.89275E-05 | 0.005892752 |
| 15 | 70798937  | 70799129  | 15_70798983  | 0 | 1 | 1 | intergenic     | TLE3(dist=408728),UACA(dist=147890)           | 5.89275E-05 | 0.005892752 |
| 18 | 25822469  | 25822661  | 18_25822617  | 1 | 0 | 1 | intergenic     | CDH2(dist=65173),MIR302F(dist=2056239)        | 5.89275E-05 | 0.005892752 |
| 18 | 28393063  | 28393255  | 18_28393109  | 0 | 1 | 1 | intergenic     | MIR302F(dist=514184),DSC3(dist=176923)        | 5.89275E-05 | 0.005892752 |
| 18 | 30979192  | 30979384  | 18_30979238  | 0 | 1 | 1 | intronic       | CCDC178                                       | 5.89275E-05 | 0.005892752 |
| 19 | 5124198   | 5124390   | 19_5124244   | 0 | 1 | 1 | intronic       | KDM4B                                         | 5.89275E-05 | 0.005892752 |
| 21 | 21397016  | 21397208  | 21_21397062  | 0 | 1 | 1 | intergenic     | MPRSS15(dist=1621093),LINC00320(dist=717831)  | 5.89275E-05 | 0.005892752 |
| 22 | 50228568  | 50228708  | 22_50228614  | 0 | 1 | 1 | intergenic     | BRD1(dist=10163),ZBED4(dist=18863)            | 5.89275E-05 | 0.005892752 |
| X  | 19565380  | 19565572  | X_19565528   | 1 | 0 | 1 | intronic       | SH3KBP1                                       | 5.89275E-05 | 0.005892752 |
| X  | 94547832  | 94548024  | X_94547878   | 0 | 1 | 1 | intergenic     | AM133A(dist=1580606),LOC643486(dist=104418)   | 5.89275E-05 | 0.005892752 |
| X  | 132959058 | 132959222 | X_132959178  | 1 | 0 | 1 | intronic       | GPC3                                          | 5.89275E-05 | 0.005892752 |

Table S2. Vector type of each integration in Pt2

| Gene                | Vector type |
|---------------------|-------------|
| <i>SMARCC1</i>      | GCsapM-ADA  |
| <i>NAGA</i>         | LASN        |
| <i>LOC100129316</i> | LASN        |
| <i>RGS9</i>         | LASN        |
| <i>DPP4</i>         | LASN        |

Table S3

GO Term

Immune system

GO:0051414, response to cortisol(Pathway)  
GO:0002924, negative regulation of humoral immune response mediated by circulating immunoglobulin(Pathway)  
GO:2000318, positive regulation of T-helper 17 type immune response(Pathway)  
GO:0002829, negative regulation of type 2 immune response(Pathway)  
GO:0002827, positive regulation of T-helper 1 type immune response(Pathway)  
GO:0002890, negative regulation of immunoglobulin mediated immune response(Pathway)  
GO:0002921, negative regulation of humoral immune response(Pathway) G  
GO:0090713, immunological memory process(Pathway)  
GO:0002923, regulation of humoral immune response mediated by circulating immunoglobulin(Pathway)  
GO:0006957, complement activation, alternative pathway(Pathway)  
GO:0051412, response to corticosterone(Pathway)  
GO:2000316, regulation of T-helper 17 type immune response(Pathway)  
GO:0002433, immune response-regulating cell surface receptor signaling pathway involved in phagocytosis(Pathway)  
GO:0002825, regulation of T-helper 1 type immune response(Pathway)  
GO:0002313, mature B cell differentiation involved in immune response(Pathway)  
GO:0002507, tolerance induction(Pathway)  
GO:0002230, positive regulation of defense response to virus by host(Pathway)  
GO:0002828, regulation of type 2 immune response(Pathway)  
GO:0002431, Fc receptor mediated stimulatory signaling pathway(Pathway)  
GO:0048536, spleen development(Pathway)  
GO:0042092, type 2 immune response(Pathway)  
GO:0072538, T-helper 17 type immune response(Pathway)  
GO:0042088, T-helper 1 type immune response(Pathway)  
GO:0002920, regulation of humoral immune response(Pathway)  
GO:0097720, calcineurin-mediated signaling(Pathway)  
GO:0002823, negative regulation of adaptive immune response based on somatic recombination of immune receptors built from immunoglobulin superfamily domains(Pathway)  
GO:0002820, negative regulation of adaptive immune response(Pathway)  
GO:0002889, regulation of immunoglobulin mediated immune response(Pathway)  
GO:0071384, cellular response to corticosteroid stimulus(Pathway)  
GO:0002294, CD4-positive, alpha-beta T cell differentiation involved in immune response(Pathway)  
GO:0002287, alpha-beta T cell activation involved in immune response(Pathway)  
GO:0002293, alpha-beta T cell differentiation involved in immune response(Pathway)  
GO:0002292, T cell differentiation involved in immune response(Pathway)  
GO:0002312, B cell activation involved in immune response(Pathway)  
GO:0001776, leukocyte homeostasis(Pathway)  
GO:0032602, chemokine production(Pathway)  
GO:0002824, positive regulation of adaptive immune response based on somatic recombination of immune receptors built from immunoglobulin superfamily domains(Pathway)  
GO:0006958, complement activation, classical pathway(Pathway)  
GO:0002698, negative regulation of immune effector process(Pathway)  
GO:0002456, T cell mediated immunity(Pathway)  
GO:0002821, positive regulation of adaptive immune response(Pathway)  
GO:0002286, T cell activation involved in immune response(Pathway)  
GO:0002455, humoral immune response mediated by circulating immunoglobulin(Pathway)  
GO:0002224, toll-like receptor signaling pathway(Pathway)  
GO:0006911, phagocytosis, engulfment(Pathway)  
GO:0045089, positive regulation of innate immune response(Pathway)  
GO:0006956, complement activation(Pathway)  
GO:0031960, response to corticosteroid(Pathway)  
GO:0002822, regulation of adaptive immune response based on somatic recombination of immune receptors built from immunoglobulin superfamily domains(Pathway)  
GO:0002819, regulation of adaptive immune response(Pathway)  
GO:0002285, lymphocyte activation involved in immune response(Pathway)  
GO:0050777, negative regulation of immune response(Pathway)  
GO:0016064, immunoglobulin mediated immune response(Pathway)  
GO:0019724, B cell mediated immunity(Pathway)  
GO:0045088, regulation of innate immune response(Pathway)  
GO:0002699, positive regulation of immune effector process(Pathway)  
GO:0002366, leukocyte activation involved in immune response(Pathway)  
GO:0002263, cell activation involved in immune response(Pathway)  
GO:0002429, immune response-activating cell surface receptor signaling pathway(Pathway)  
GO:0002757, immune response-activating signal transduction(Pathway)  
GO:0002768, immune response-regulating cell surface receptor signaling pathway(Pathway)  
GO:0006959, humoral immune response(Pathway)  
GO:0002697, regulation of immune effector process(Pathway)  
GO:0002449, lymphocyte mediated immunity(Pathway)  
GO:0002460, adaptive immune response based on somatic recombination of immune receptors built from immunoglobulin superfamily domains(Pathway)  
GO:0002253, activation of immune response(Pathway)  
GO:0002683, negative regulation of immune system process(Pathway)  
GO:0002443, leukocyte mediated immunity(Pathway)  
GO:0002764, immune response-regulating signaling pathway(Pathway)  
GO:0050778, positive regulation of immune response(Pathway)  
GO:0002252, immune effector process(Pathway)  
GO:0002250, adaptive immune response(Pathway)  
GO:0045087, innate immune response(Pathway)  
GO:0050776, regulation of immune response(Pathway)  
GO:0002684, positive regulation of immune system process(Pathway)  
GO:0002520, immune system development(Pathway)  
GO:0002682, regulation of immune system process(Pathway)  
GO:0006955, immune response(Pathway)  
GO:0002376, immune system process(Pathway)



**Hematopoietic system**

GO:1902035, positive regulation of hematopoietic stem cell proliferation(Pathway)  
GO:1902033, regulation of hematopoietic stem cell proliferation(Pathway)  
GO:0071425, hematopoietic stem cell proliferation(Pathway)  
GO:0060218, hematopoietic stem cell differentiation(Pathway)  
GO:1901532, regulation of hematopoietic progenitor cell differentiation(Pathway)  
GO:0002244, hematopoietic progenitor cell differentiation(Pathway)  
GO:0048534, hematopoietic or lymphoid organ development(Pathway)  
GO:0002901, mature B cell apoptotic process(Pathway)  
GO:0003159, morphogenesis of an endothelium(Pathway)  
GO:0061154, endothelial tube morphogenesis(Pathway)  
GO:0045446, endothelial cell differentiation(Pathway)  
GO:0003158, endothelium development(Pathway)  
GO:0030097, hemopoiesis(Pathway)

## Supplemental figure

Figure S1

A

Pt1

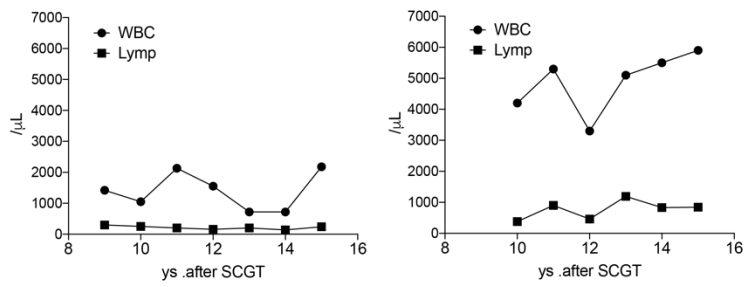

B

Pt2

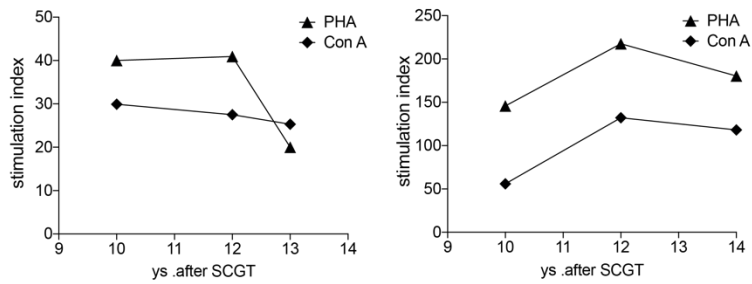

Figure S1. Levels of immune reconstitutions more than 10 years after SCGT in both patients. (A and B) Lymphocyte counts and the responses to mitogens were shown for both patients.

Figure S2

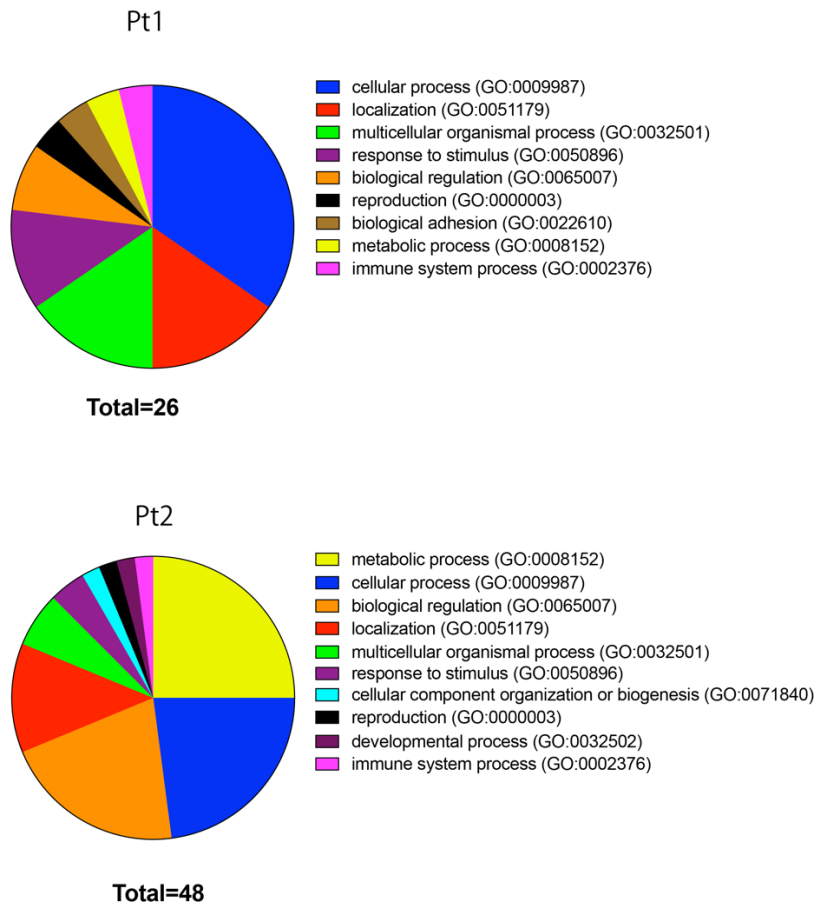

Figure S2. Biological categories of the genes proximal to the vector integration sites.

In gene ontology enrichment analysis, genes near ISs with total read numbers of more than 1% of all integrations were not statistically enriched in specific categories in both patients.

Figure S3

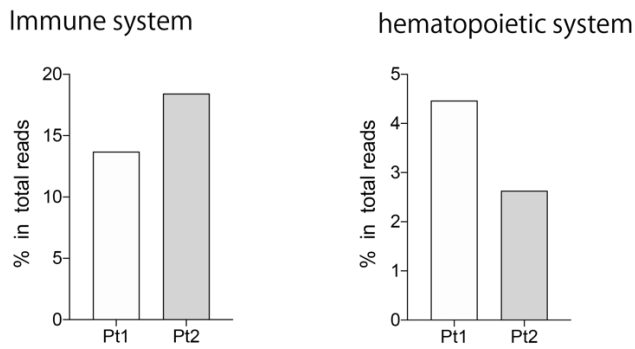

Figure S3. Function of genes hit by retroviral vector in the patients.

The functions of the genes with vector integration were analyzed. Frequencies of the genes that were involved in immune and hematopoietic system were shown.

Figure S4

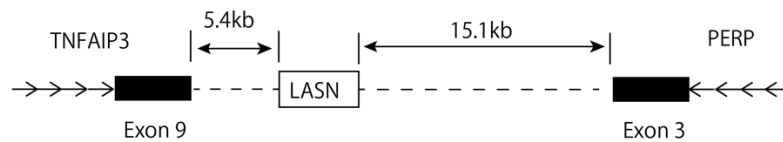

Figure S4. Structure of LASN integration between *TNFAIP3* and *PERP* in Pt2. LASN provirus located 5.4 kb downstream of *TNFAIP3* and 15.1 kb downstream of *PERP*, both of which have been reported as cancer genes.

Figure S5

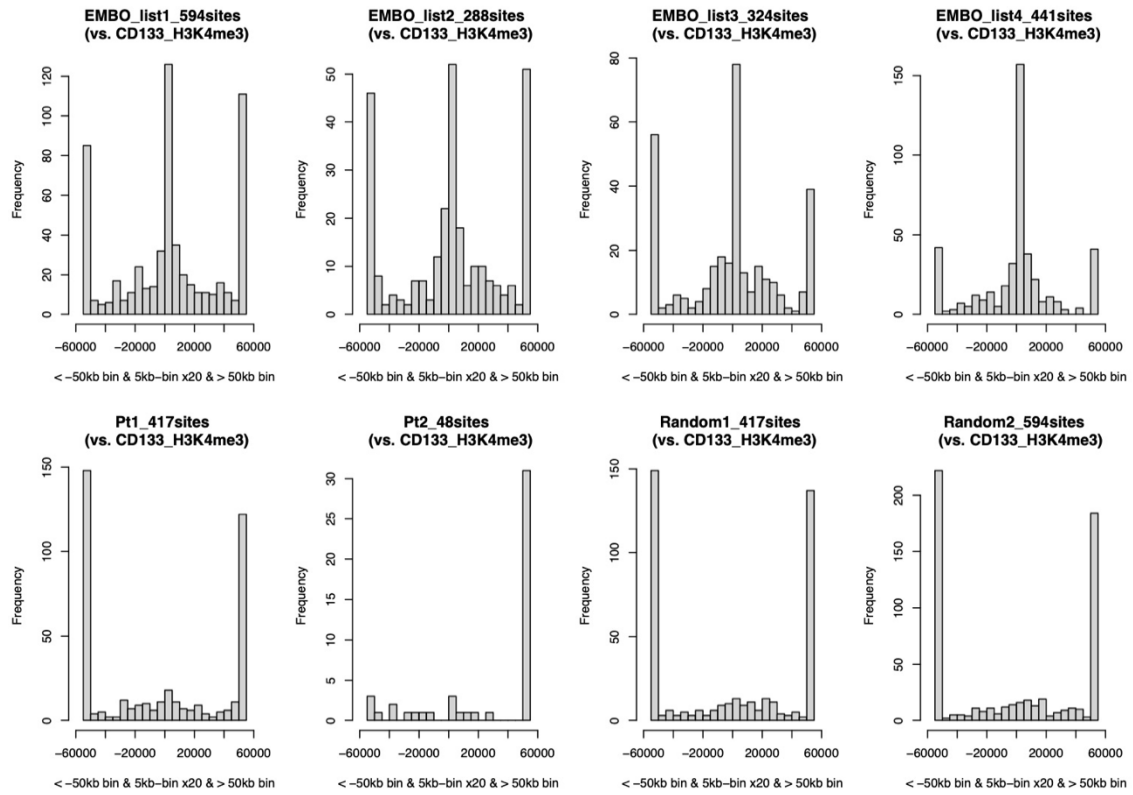

Figure S5. Distribution of the distance from the active transcriptional start site (TSS) in each integration. Each integration is analyzed for the distance from the sites of H3K4me3 modification corresponding to TSS of the genes. The data of the integration in the previous report (Biasco, et al<sup>14</sup>) and randomly selected region as controls were also shown.

Figure S6

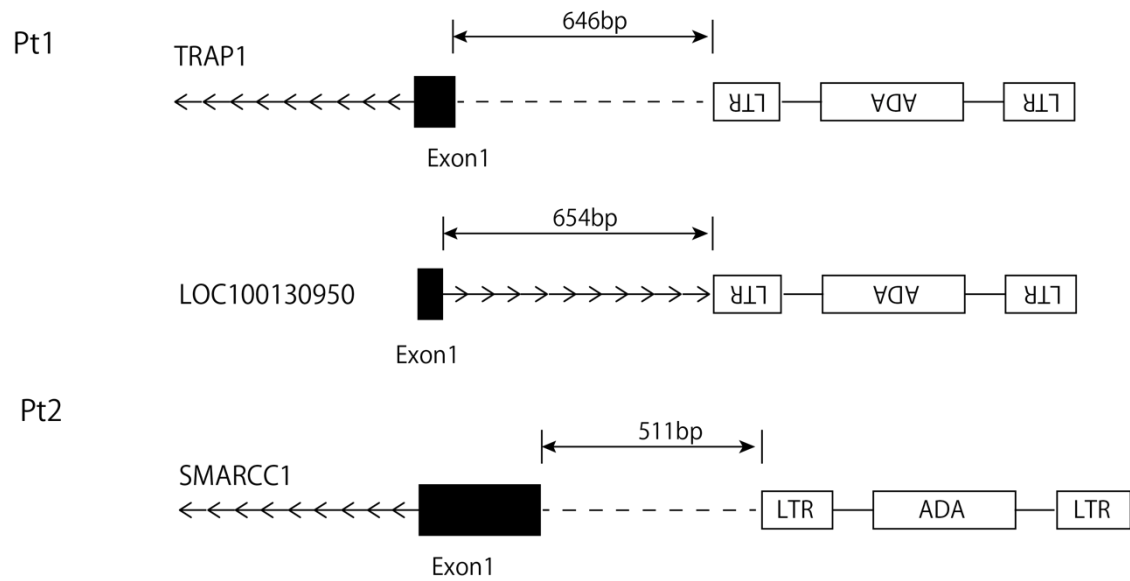

Figure S6. GCsapM-ADA provirus in the dominant clones in the patients. Integration of GCsapM-ADA was detected in active transcriptional start site (TSS) of *TRAP1* and *LOC10012950* in Pt1, and *SMARCC1* in Pt2.

# Supplemental file 1

## LTR sequences of GCsapM-ADA and LASN

MSPV-LTR  
sequence  
as a part of GCsapADA sequence

```
>MSPV-LTR_444bp
AATGAAAGACCCACCTGTAGGTTTGGCAAGCTAGCTTAAGTAACGCCATTTGCAAGGCATGGAAAAATACATAACTGAGAATAGAGAAGTTCAGATCAAGGTCAGG
AACAGAGAAACAGGAGAATATGGGCCAAACAGGATATCTGTGGTAAGCAGTTCCTGCCCGCTCAGGGCCAAGAACAGTTGGAACAGGAGAATATGGGCCAAACAG
GATATCTGTGGTAAGCAGTTCCTGCCCGCTCAGGGCCAAGAACAGATGGTCCCAGATCGGTCCCGCCCTCAGCAGTTTCTAGAGAACCATCAGATGTTTCCAGG
GTGCCCAAGGACCTGAAATGACCCTGTGCCTTATTTGAACTAACCAATCAGTTCGCTTCTCGCTTCTGTTTCGCGCGCTTCTGCTCCCGAGCTCAATAAAAGAGCC
CACAAACCCTCACTCGGC
```

MoMLV-LTR  
sequence  
as a part of the LASN sequence

```
>LASN-LTR (=MoMLV-_589bp)
TTTGAAGACCCACCCGTAGGTGGCAAGCTAGCTTAAGTAACGCCACTTTGCAAGGCATGGAAAAATACATAACTGAGAATAGGAAAGTTCAGATCAAGGTCAGGA
ACAAAGAAACAGCTGAATACCAAACAGGATATCTGTGGTAAGCAGTTCCTGCCCGCTCAGGGCCAAGAACAGATGAGACAGCTGAGTATGGGCCAAACAGGAT
ATCGTGTGTAAGCAGTTCCTGCCCGCTCGGGCCAAGAACAGATGGTCCCAGATCGGTCCAGCCCTCAGCAGTTTCTAGTGAATCATCAGATGTTTCCAGGG
TGCCCAAGGACCTGAAATGACCCTGTACCTTATTTGAACTAACCAATCAGTTCGCTTCTCGCTTCTGTTTCGCGCGCTTCCGCTCTCCGAGCTCAATAAAAGAGCCC
ACAACCCTCACTCGGCGCGCCAGTCTCCGATAGACTGCGTCGCCCGGTACCCGATTCCAATAAAGCCTCTTGCTGTTTGCATCCGAATCGTGGTCTCGCTG
TTCCTTGGGAGGGTCTCCTCTGAGTGATTGACTACCCACGACGGGGTCTTTCATT
```

Custom SureSelect LTR baits for three LTR sequences (MoMLV-LTR, MPSV-LTR)

The baits also contains baits for SHH exons.

Design ID: 0812211

| TargetID  | ProbelD           | Sequence                                                                                                                 | Replication |
|-----------|-------------------|--------------------------------------------------------------------------------------------------------------------------|-------------|
| MoMLV-LTR | MoMLV-LTR_1-120   | TTTGAAGACCCACCCGTAGGTGGCAAGCTAGCTTAAGTAACGCCACTTTGCAAGGCATGGAAAAATACATAACTGAGAATAGGAAAGTTGAGATCAAGGTGAGAACAAAGAAACAGC    | 1           |
| MoMLV-LTR | MoMLV-LTR_31-150  | TAGCTTAAGTAACGCCACTTTGCAAGGCATGGAAAAATACATAACTGAGAATAGGAAAGTTGAGATCAAGGTGAGAACAAAGAAACAGCTGAATACCAAACAGGATATCTGTGGTAAGC  | 1           |
| MoMLV-LTR | MoMLV-LTR_61-180  | GGAAAAATACATAACTGAGAATAGGAAAGTTGAGATCAAGGTGAGAACAAAGAAACAGCTGAATACCAAACAGGATATCTGTGGTAAGCGGTTCTGCCCGGCTCAGGGCCAAGAAC     | 1           |
| MoMLV-LTR | MoMLV-LTR_91-210  | TCAGATCAAGGTGAGAACAAAGAAACAGCTGAATACCAAACAGGATATCTGTGGTAAGCGGTTCTGCCCGGCTCAGGGCCAAGAACAGATGAGACAGCTGAGTGATGGGCCAAACAG    | 1           |
| MoMLV-LTR | MoMLV-LTR_121-240 | TGAATACCAAACAGGATATCTGTGGTAAGCGGTTCTGCCCGGCTCAGGGCCAAGAACAGATGAGACAGCTGAGTGATGGGCCAAACAGGATATCTGTGTAAGCAGTTCTGCCCGG      | 1           |
| MoMLV-LTR | MoMLV-LTR_151-270 | GGTTCTGCCCGGCTCAGGGCCAAGAACAGATGAGACAGCTGAGTGATGGGCCAAACAGGATATCTGTGTAAGCAGTTCTGCCCGGCTCGGGCCAAGAACAGATGGTCCCCAGAT       | 1           |
| MoMLV-LTR | MoMLV-LTR_181-300 | GATGAGACAGCTGAGTGATGGGCCAAACAGGATATCTGTGTAAGCAGTTCTGCCCGGCTCGGGCCAAGAACAGATGGTCCCCAGATGCGGTCCAGCCCTCAGCAGTTTCTAGTGAA     | 1           |
| MoMLV-LTR | MoMLV-LTR_211-330 | GATATCTGTGTAAGCAGTTCTGCCCGGCTCGGGCCAAGAACAGATGGTCCCCAGATGCGGTCCAGCCCTCAGCAGTTTCTAGTGAATCATCAGATGTTTCCAGGGTGCCCAAGGA      | 1           |
| MoMLV-LTR | MoMLV-LTR_241-360 | CTCGGGGCCAAGAACAGATGTTCCAGATGCGGTCCAGCCCTCAGCAGTTTCTAGTGAATCATCAGATGTTTCCAGGGTGCCCAAGGACCTGAAATGACCCCTGTACCTATTTGAAC     | 1           |
| MoMLV-LTR | MoMLV-LTR_271-390 | GCGGTCCAGCCCTCAGCAGTTTCTAGTGAATCATCAGATGTTTCCAGGGTGCCCAAGGACCTGAAATGACCCCTGTACCTATTTGAACAAACCAATCAGTTCGCTTCTCGCTTCTGTT   | 1           |
| MoMLV-LTR | MoMLV-LTR_301-420 | TCATCAGATGTTTCCAGGGTGCCCAAGGACCTGAAATGACCCCTGTACCTATTTGAACAAACCAATCAGTTCGCTTCTCGCTTCTCGCTTCTCGCTTCTCGCTTCTCGCTTCTGTT     | 1           |
| MoMLV-LTR | MoMLV-LTR_331-450 | CCTGAAATGACCCCTGTACCTATTTGAACAAACCAATCAGTTCGCTTCTCGCTTCTCGCTTCTCGCTTCTCGCTTCTCGCTTCTCGCTTCTCGCTTCTCGCTTCTCGCTTCTCGCTTCTG | 1           |
| MoMLV-LTR | MoMLV-LTR_361-480 | TAACCAATCAGTTCGCTTCTCGCTTCTCGCTTCTCGCTTCTCGCTTCTCGCTTCTCGCTTCTCGCTTCTCGCTTCTCGCTTCTCGCTTCTCGCTTCTCGCTTCTCGCTTCTCGCTTCTG  | 1           |
| MoMLV-LTR | MoMLV-LTR_391-510 | CGGCGCTTCCGCTCCTCGAGCTCAATAAAAGAGCCCAACCCCTCACTCGGCGGCCAGTCTTCCGATAGACTGCGTCCGCCGGGTACCCGATTTCCCAATAAAGCCTCTTGCTGTTT     | 1           |
| MoMLV-LTR | MoMLV-LTR_421-540 | AGAGCCCAACCCCTCACTCGGCGGCCAGTCTTCCGATAGACTGCGTCCGCCGGGTACCCGATTTCCCAATAAAGCCTCTTGCTGTTTGCATCCGAATCGTGGTCTCGCTGTTCCCTG    | 1           |
| MoMLV-LTR | MoMLV-LTR_451-570 | GTCTTCCGATAGACTGCGTCCGCCGGGTACCCGATTTCCCAATAAAGCCTCTTGCTGTTTGCATCCGAATCGTGGTCTCGCTGTTCCCTTGGAGGGTCTCCTCTGAGTGATTGACTACCC | 1           |
| MoMLV-LTR | MoMLV-LTR_470-589 | CGCCGGGTACCCGATTTCCCAATAAAGCCTCTTGCTGTTTGCATCCGAATCGTGGTCTCGCTGTTCCCTTGGAGGGTCTCCTCTGAGTGATTGACTACCCACGACGGGGTCTTTTCATT  | 1           |
| MPSV-LTR  | MPSV-LTR_1-120    | AATGAAAGACCCACCTGTAGGTTGGCAAGCTAGCTTAAGTAACGCCACTTTGCAAGGCATGGAAAAATACATAACTGAGAATAGAGAAGTTGAGATCAAGGTGAGAACAGAGAAACAG   | 1           |
| MPSV-LTR  | MPSV-LTR_31-150   | GCTAGCTTAAGTAACGCCACTTTGCAAGGCATGGAAAAATACATAACTGAGAATAGAGAAGTTGAGATCAAGGTGAGAACAGAGAAACAGGAGAATATGGGCCAAACAGGATATCTGTGG | 1           |
| MPSV-LTR  | MPSV-LTR_61-180   | TGGAAAAATACATAACTGAGAATAGAGAAGTTGAGATCAAGGTGAGAACAGAGAAACAGGAGAATATGGGCCAAACAGGATATCTGTGGTAAGCAGTTCTGCCCGCTCAGGGCCAAG    | 1           |
| MPSV-LTR  | MPSV-LTR_91-210   | TTGAGATCAAGGTGAGAACAGAGAAACAGGAGAATATGGGCCAAACAGGATATCTGTGGTAAGCAGTTCTGCCCGCTCAGGGCCAAGAACAGTTGGAACAGGAGAATATGGGCCAAA    | 1           |
| MPSV-LTR  | MPSV-LTR_121-240  | GAGAATATGGGCCAAACAGGATATCTGTGGTAAGCAGTTCTGCCCGCTCAGGGCCAAGAACAGTTGGAACAGGAGAATATGGGCCAAACAGGATATCTGTGGTAAGCAGTTCTGCC     | 1           |
| MPSV-LTR  | MPSV-LTR_151-270  | TAAGCAGTTCTGCCCGCTCAGGGCCAAGAACAGTTGGAACAGGAGAATATGGGCCAAACAGGATATCTGTGGTAAGCAGTTCTGCCCGCTCAGGGCCAAGAACAGATGGTCCCCAG     | 1           |
| MPSV-LTR  | MPSV-LTR_181-300  | AACAGTTGGAACAGGAGAATATGGGCCAAACAGGATATCTGTGGTAAGCAGTTCTGCCCGCTCAGGGCCAAGAACAGATGGTCCCCAGATCGGTCCCGCCCTCAGCAGTTTCTAGAGA   | 1           |
| MPSV-LTR  | MPSV-LTR_211-330  | CAGGATATCTGTGGTAAGCAGTTCTGCCCGCTCAGGGCCAAGAACAGATGGTCCCCAGATCGGTCCCGCCCTCAGCAGTTTCTAGAGAACCATCAGATGTTTCCAGGGTGCCCAAGG    | 1           |
| MPSV-LTR  | MPSV-LTR_241-360  | CGCTCAGGGCCAAGAACAGATGGTCCCCAGATCGGTCCCGCCCTCAGCAGTTTCTAGAGAACCATCAGATGTTTCCAGGGTGCCCAAGGACCTGAAATGACCCCTGTGCCTATTTGAAC  | 1           |
| MPSV-LTR  | MPSV-LTR_271-390  | ATCGGTCCCGCCCTCAGCAGTTTCTAGAGAACCATCAGATGTTTCCAGGGTGCCCAAGGACCTGAAATGACCCCTGTGCCTATTTGAACAAACCAATCAGTTCGCTTCTCGCTTCTGTT  | 1           |
| MPSV-LTR  | MPSV-LTR_301-420  | ACCATCAGATGTTTCCAGGGTGCCCAAGGACCTGAAATGACCCCTGTGCCTATTTGAACAAACCAATCAGTTCGCTTCTCGCTTCTGTTCCGCGCTTCTGCTCCCGAGCTCAATAAA    | 1           |
| MPSV-LTR  | MPSV-LTR_325-444  | CCAAGGACCTGAAATGACCCCTGTGCCTATTTGAACAAACCAATCAGTTCGCTTCTCGCTTCTGTTCCGCGCTTCTGCTCCCGAGCTCAATAAAAGAGCCCAACCCCTCACTCGGC     | 1           |



## Baits for SHH

browser position chr7:155595548-155596430

track name="Target Regions" description="Agilent SureSelect DNA - SHH\_151219 - Target regions of interest given as input to probe selection" color=0,128,0

chr7 155595547 155596430 SHH

chr7 155598979 155599261 SHH

chr7 155604506 155604977 SHH

track name="Missed" description="Agilent SureSelect DNA - SHH\_151219 - Target regions of interest that will not be sequenced" color=128,0,0

chr7 155595568 155595608 SHH

chr7 155595728 155595781 SHH

chr7 155604923 155604950 SHH

track name="Covered" description="Agilent SureSelect DNA - SHH\_151219 - Genomic regions expected to be sequenced" color=0,128,0

chr7 155595388 155595568 SHH

chr7 155595608 155595728 SHH

chr7 155595781 155596441 SHH

chr7 155598970 155599270 SHH

chr7 155604503 155604923 SHH

chr7 155604950 155605130 SHH

## Supplemental file 2

### Primers and probes for VCN analysis

| Target                  | primer/probe | primer/probe ID  | sequence                                       |
|-------------------------|--------------|------------------|------------------------------------------------|
| packaging signal $\psi$ | Fw           | Packaging Fw     | GCAACCTATCTGTGTCTGTCC                          |
|                         | Rv           | Packaging Rv     | GGTCCGCCAGATACAGAG                             |
|                         | Probe        | Packaging Probe  | /56-FAM/TGCGGCCTGC/ZEN/GTCGTACTAGTTAG/3IABkFQ/ |
| GCsapM-ADA              | Fw           | GCsapM-ADA Fw    | TAGACGGCATCGCAGCTTGG                           |
|                         | Rv           | GCsapM-ADA Rv    | TCCGTCTAGGTGGACATGCAGT                         |
|                         | Probe        | GCsapM-ADA Probe | /56-FAM/CGCCCGCCT/ZEN/TCGACAAGCCCAAAG/3YABkFQ/ |
| RPP30                   | Fw           | RPP30 Fw         | TCCAGGAGGGAGAATTGATG                           |
|                         | Rv           | RPP30 Rv         | ATGGTCCGTCTCAGGAAATG                           |
|                         | Probe        | RPP30 Probe      | /HEX/TCCCTAGGT/ZEN/GGCCTGAGCAG/3IABkFQ/        |

## Primers and probes for IS-specific ddPCR

### Pt1

| Gene name    | primer/probe | primer/probe ID      | sequence                                       |
|--------------|--------------|----------------------|------------------------------------------------|
| TRAP1        | Fw           | ddTP Up Fw1          | GAGGCACAGTCTCAAAGGTC                           |
|              | Rv           | ddTP Up Rv1          | TGAGTGATTGACTACCCACGA                          |
|              | Probe        | ddTP Up Probe 1      | /56-FAM/GCTTGGGTTACAGCTTGCTT/3BHQ              |
| LOC100130950 | Fw           | ddLOC Down Fw2       | CAAACCTACAGGTGGGGTCT                           |
|              | Rv           | ddLOC Down Rv2       | GCACTGACAGTTTTGCTTCG                           |
|              | Probe        | ddLOC Down Probe 2   | /56-FAM/TAAGATGTCCAACCCCAAGC/3BHQ              |
| ZFAND3       | Fw           | ddZFAND3 Fw          | TGCATCCGAATCGTGGTCTC                           |
|              | Rv           | ddZFAND3 Rv          | CCTGGCCAACAGTTGCTTTC                           |
|              | Probe        | ddZFAND3             | /56-FAM/CCACGACGG/ZEN/GGGTCTTTCACCTTG/3IABkFQ/ |
| DIP2A        | Fw           | ddDIP2A/USP4 Fw      | TCCATGCCTTGCAAATGGC                            |
|              | Rv           | ddDIP2A Rv           | TCATTGAGGCTGGTCCAACC                           |
|              | Probe        | ddDIP2A/USP4         | /56-FAM/GCTTGCCAA/ZEN/ACCTACAGGTGGGGT/3IABkFQ/ |
| USP4         | Fw           | ddDIP2A/USP4 Fw      | TCCATGCCTTGCAAATGGC                            |
|              | Rv           | ddUSP4 Rv            | TCTGGTCCCTTGAGTCTCCC                           |
|              | Probe        | ddDIP2A/USP4         | /56-FAM/GCTTGCCAA/ZEN/ACCTACAGGTGGGGT/3IABkFQ/ |
| LMO2         | Fw           | ddPCRLMO2Sense4      | CTTGCAAATGGCGTTA                               |
|              | Rv           | ddPCRLMO2Anti-sense4 | GCTGGAATCGAGACAA                               |
|              | Probe        | Lower_Junc 2 LMO     | /56-FAM/TTCAATTCCTTGCTAGAACTCAACA/3BHQ         |

### Pt2

| Gene name | primer/probe | primer/probe ID  | sequence                         |
|-----------|--------------|------------------|----------------------------------|
| SMARCC1   | Fw           | ddSMARCFW2       | AATCGTGGTCTCGCTGTTCC             |
|           | Rv           | ddSMARCRV2       | TCGAAAGAGCCAGTGCAAGG             |
|           | Probe        | SMARCC probe-new | /56-FAM/TTCAATTCCTGCCCCAGGG/3BHQ |

## Primers/probes for transcription levels of integrated genes

| Patient   | Gene name | IDT Assay ID        |
|-----------|-----------|---------------------|
| Pt1       | TRAP1     | Hs.PT.58.19693862   |
|           | GPX1      | Hs.PT.58.39247474.g |
|           | RAP1B     | Hs.PT.58.26098638   |
| Pt2       | DPP4      | Hs.PT.58.39108231.g |
|           | TNFAIP3   | Hs.PT.58.1824217    |
|           | PERP      | Hs.PT.58.40332203   |
|           | MLLT10    | Hs.PT.58.1482781    |
|           | SMARCC1   | Hs.PT.58.3919159    |
| Reference | TBP       | Hs.PT.58v.39858774  |
